# Supplementary material
Source: PubMed Central journal article supplement (PMC6390957)
Supplement: NIHMS999342-supplement-Digital_content.pdf [file NIHMS999342-supplement-Digital_content.pdf]

**Supplementary Table I.** DMF5/GFP.Bcl-2 and DMF5/Bcl-xL.GFP cells do not have survival advantage after coculture with specific tumor targets<sup>1</sup>

|                 | % GFP <sup>+</sup> (AnnexinV <sup>-</sup> 7AAD <sup>-</sup> gate) <sup>1</sup> |       |       |                   |
|-----------------|--------------------------------------------------------------------------------|-------|-------|-------------------|
|                 | v. 888                                                                         | v.526 | v. T2 | v. T2<br>+peptide |
| DMF5<br>/Bcl-2  | 70.2                                                                           | 63.56 | 67.47 | 65.82             |
| DMF5<br>/Bcl-xL | 81.93                                                                          | 76.26 | 79.53 | 78.31             |

<sup>1</sup>Percentage of GFP<sup>+</sup> cells, gated on the viable (7AAD<sup>-</sup>) and Annexin-V<sup>-</sup> population, after overnight coculture with specific and non-specific tumors. Lack of enrichment of GFP<sup>+</sup> population after coculture with specific tumors suggests no inhibition of apoptosis due to AICD.

**Supplementary 1. Basal level of expression of Bcl-2 and Bcl-xL in PBL before and after stimulation.** RT-PCR analysis of gene expression of *BCL2* (Bcl-2) and *BCL2L10* (Bcl-xL) in relation to five house keeping genes. RNA was extracted from samples frozen at three time points – pheresis, Stim1d10, and REP1d10. Data is plotted as a log of  $2^{(-Avg(\Delta Ct))}$  as determined by comparison to five house-keeping genes: *β2M*, *HPRT1*, *RPL13A*, *GAPDH*, and *ACTB*.
