# Supplementary material
Source: PubMed Central journal article supplement (PMC6390957)
Supplement: NIHMS999342-supplement-Image_1.pdf [file NIHMS999342-supplement-Image_1.pdf]

[(experimental cpm – spontaneous cpm) /  
(maximal cpm – spontaneous cpm)] × 100

3
